# Supplementary material
Source: PubMed Central journal article supplement (PMC3821933)
Supplement: NIHMS522419-supplement-1_si_001.pdf [file NIHMS522419-supplement-1_si_001.pdf]

**Supporting information for**

**Structural Basis for Assembly and Activation of the Mn<sup>IV</sup>/Fe<sup>III</sup> Cofactor in the Class**

**Ic Ribonucleotide Reductase from *Chlamydia trachomatis***

**Table S1.** Data collection and refinement statistics for apo  $\beta_2$ .

|                                        | apo $\beta_2$          | apo $\beta_2$ (Fe ano) | apo $\beta_2$ (Mn ano) |
|----------------------------------------|------------------------|------------------------|------------------------|
| <b>Data collection</b>                 |                        |                        |                        |
| Wavelength                             | 1.078 Å                | 1.72 Å                 | 1.86 Å                 |
| Space group                            | $P2_1$                 | $P2_1$                 | $P2_1$                 |
| Cell dimensions                        |                        |                        |                        |
| <i>a</i> , <i>b</i> , <i>c</i> (Å)     | 74.975, 97.394, 99.237 | 74.898, 97.431, 99.292 | 75.127, 97.711, 99.491 |
| $\beta$ (°)                            | 97.760                 | 97.683                 | 97.691                 |
| Resolution (Å)                         | 30.00-1.70 (1.73-1.70) | 50.00-2.25 (2.29-2.25) | 50.00-2.43 (2.47-2.43) |
| $R_{\text{sym}}$ or $R_{\text{merge}}$ | 0.063 (0.749)          | 0.103 (0.359)          | 0.116 (0.447)          |
| $I / \sigma I$                         | 28.6 (1.9)             | 22.1 (6.4)             | 20.8 (5.0)             |
| Completeness (%)                       | 99.7 (97.7)            | 98.3 (96.2)            | 98.3 (96.2)            |
| Redundancy                             | 5.6 (4.1)              | 7.5 (7.2)              | 7.4 (6.2)              |
| <b>Refinement</b>                      |                        |                        |                        |
| Resolution (Å)                         | 30.00-1.70             |                        |                        |
| No. reflections                        | 147567                 |                        |                        |
| $R_{\text{work}} / R_{\text{free}}$    | 0.1794/0.2103          |                        |                        |
| No. atoms                              |                        |                        |                        |
| Protein                                | 10946                  |                        |                        |
| Ion/ligand                             | N/A                    |                        |                        |
| Water                                  | 888                    |                        |                        |
| <i>B</i> -factors                      |                        |                        |                        |
| Protein                                | 21.0                   |                        |                        |
| Ion/ligand                             | N/A                    |                        |                        |
| Water                                  | 32.8                   |                        |                        |
| r.m.s. deviations                      |                        |                        |                        |
| Bond lengths (Å)                       | 0.008                  |                        |                        |
| Bond angles (°)                        | 1.015                  |                        |                        |

**Table S2.** Data collection and refinement statistics for Mn<sup>II</sup>/Fe<sup>II</sup>- $\beta_2$ .

|                                        | Mn <sup>II</sup> /Fe <sup>II</sup> - $\beta_2$ | Mn <sup>II</sup> /Fe <sup>II</sup> - $\beta_2$ (Fe ano) | Mn <sup>II</sup> /Fe <sup>II</sup> - $\beta_2$ (Mn ano) |
|----------------------------------------|------------------------------------------------|---------------------------------------------------------|---------------------------------------------------------|
| <b>Data collection</b>                 |                                                |                                                         |                                                         |
| Wavelength                             | 1.078 Å                                        | 1.72 Å                                                  | 1.86 Å                                                  |
| Space group                            | $P2_1$                                         | $P2_1$                                                  | $P2_1$                                                  |
| Cell dimensions                        |                                                |                                                         |                                                         |
| <i>a</i> , <i>b</i> , <i>c</i> (Å)     | 74.897, 97.455, 99.315                         | 74.994, 97.813, 99.624                                  | 74.910, 97.373, 99.248                                  |
| $\beta$ (°)                            | 97.765                                         | 97.777                                                  | 97.746                                                  |
| Resolution (Å)                         | 50.00-1.80 (1.83-1.80)                         | 50.00-2.25 (2.29-2.25)                                  | 50.00-2.43 (2.47-2.43)                                  |
| $R_{\text{sym}}$ or $R_{\text{merge}}$ | 0.116 (0.497)                                  | 0.123 (0.499)                                           | 0.109 (0.338)                                           |
| $I / \sigma I$                         | 16.8 (2.9)                                     | 18.5 (3.8)                                              | 21.6 (5.8)                                              |
| Completeness (%)                       | 99.9 (98.9)                                    | 99.9 (99.2)                                             | 100.0 (99.6)                                            |
| Redundancy                             | 5.5 (4.0)                                      | 7.2 (5.1)                                               | 7.3 (6.1)                                               |
| <b>Refinement</b>                      |                                                |                                                         |                                                         |
| Resolution (Å)                         | 50.00-1.80                                     |                                                         |                                                         |
| No. reflections                        | 123898                                         |                                                         |                                                         |
| $R_{\text{work}} / R_{\text{free}}$    | 0.1725/0.2022                                  |                                                         |                                                         |
| No. atoms                              |                                                |                                                         |                                                         |
| Protein                                | 10889                                          |                                                         |                                                         |
| Metal                                  | 8                                              |                                                         |                                                         |
| Other ion/ligand                       | 23                                             |                                                         |                                                         |
| Water                                  | 1027                                           |                                                         |                                                         |
| <i>B</i> -factors                      |                                                |                                                         |                                                         |
| Protein                                | 15.6                                           |                                                         |                                                         |
| Metal                                  | 16.7                                           |                                                         |                                                         |
| Other ion/ligand                       | 39.6                                           |                                                         |                                                         |
| Water                                  | 28.5                                           |                                                         |                                                         |
| r.m.s. deviations                      |                                                |                                                         |                                                         |
| Bond lengths (Å)                       | 0.008                                          |                                                         |                                                         |
| Bond angles (°)                        | 1.011                                          |                                                         |                                                         |

**Table S3.** Data collection statistics for Mn<sup>II</sup>-β<sub>2</sub> (1 equiv Mn<sup>II</sup> per β).<sup>a</sup>

|                                                      | Mn <sup>II</sup> -β <sub>2</sub> (1 equiv) | Mn <sup>II</sup> -β <sub>2</sub> (1 equiv) [Mn ano] |
|------------------------------------------------------|--------------------------------------------|-----------------------------------------------------|
| <b>Data collection</b>                               |                                            |                                                     |
| Wavelength                                           | 0.979 Å                                    | 1.860 Å                                             |
| Space group                                          | <i>P2</i> <sub>1</sub>                     | <i>P2</i> <sub>1</sub>                              |
| Cell dimensions                                      |                                            |                                                     |
| <i>a, b, c</i> (Å)                                   | 74.905, 97.920, 100.391                    | 75.371, 98.144, 100.704                             |
| β (°)                                                | 97.609                                     | 97.638                                              |
| Resolution (Å)                                       | 50.00-1.76 (1.79-1.76)                     | 50.00-2.42 (2.45-2.42)                              |
| <i>R</i> <sub>sym</sub> or <i>R</i> <sub>merge</sub> | 0.077 (0.573)                              | 0.085 (0.332)                                       |
| <i>I</i> / σ <i>I</i>                                | 24.7 (2.6)                                 | 29.2 (8.0)                                          |
| Completeness (%)                                     | 99.0 (97.7)                                | 97.2 (94.5)                                         |
| Redundancy                                           | 7.6 (6.5)                                  | 7.7 (7.6)                                           |

<sup>a</sup>Crystallized aerobically by hanging drop vapor diffusion with 0.1 M HEPES, pH 7.2, 5% (w/v) PEG 3000, 0.2 M sodium acetate as the precipitant. Crystals were overlaid with cryoprotectant solution (well solution supplemented with 50% (v/v) glycerol) prior to data collection.



**Table S4.** Data collection statistics for Mn<sup>II</sup>-β<sub>2</sub> (2 equiv Mn<sup>II</sup> per β + 10 mM MnCl<sub>2</sub> soak).<sup>a</sup>

|                                                      | Mn <sup>II</sup> -β <sub>2</sub> (excess Mn <sup>II</sup> ) | Mn <sup>II</sup> -β <sub>2</sub> (excess Mn <sup>II</sup> ) [Mn ano] |
|------------------------------------------------------|-------------------------------------------------------------|----------------------------------------------------------------------|
| <b>Data collection</b>                               |                                                             |                                                                      |
| Wavelength                                           | 0.979 Å                                                     | 1.860 Å                                                              |
| Space group                                          | <i>P</i> 2 <sub>1</sub>                                     | <i>P</i> 2 <sub>1</sub>                                              |
| Cell dimensions                                      |                                                             |                                                                      |
| <i>a, b, c</i> (Å)                                   | 75.268, 98.029, 100.576                                     | 75.229, 97.967, 100.483                                              |
| β (°)                                                | 97.765                                                      | 97.742                                                               |
| Resolution (Å)                                       | 30.00-1.70 (1.73-1.70)                                      | 50.00-2.43 (2.47-2.43)                                               |
| <i>R</i> <sub>sym</sub> or <i>R</i> <sub>merge</sub> | 0.062 (0.691)                                               | 0.104 (0.404)                                                        |
| <i>I</i> / σ <i>I</i>                                | 22.4 (2.1)                                                  | 20.7 (6.4)                                                           |
| Completeness (%)                                     | 98.9 (97.7)                                                 | 97.8 (95.2)                                                          |
| Redundancy                                           | 5.8 (5.6)                                                   | 7.0 (7.5)                                                            |

<sup>a</sup>Crystallized aerobically by hanging drop vapor diffusion with 0.1 M HEPES, pH 7.5, 20% (w/v) PEG 3000, 0.2 M sodium acetate as the precipitant. Crystals were overlaid with cryoprotectant solution (well solution supplemented with 50% (v/v) glycerol) prior to data collection.

**Table S5.** Data collection statistics for  $\text{Mn}^{\text{IV}}/\text{Fe}^{\text{III}}\text{-}\beta_2$  (1 equiv  $\text{Mn}^{\text{II}}$  + 1 equiv  $\text{Fe}^{\text{II}}$  per  $\beta$  followed by exposure to excess  $\text{O}_2$ ).

|                                        | $\text{Mn}^{\text{IV}}/\text{Fe}^{\text{III}}\text{-}\beta_2$<br>(1:1 $\text{Mn}^{\text{II}}:\text{Fe}^{\text{II}}$ ) | $\text{Mn}^{\text{IV}}/\text{Fe}^{\text{III}}\text{-}\beta_2$<br>(1:1 $\text{Mn}^{\text{II}}:\text{Fe}^{\text{II}}$ ) [Fe ano] | $\text{Mn}^{\text{IV}}/\text{Fe}^{\text{III}}\text{-}\beta_2$<br>(1:1 $\text{Mn}^{\text{II}}:\text{Fe}^{\text{II}}$ ) [Mn ano] |
|----------------------------------------|-----------------------------------------------------------------------------------------------------------------------|--------------------------------------------------------------------------------------------------------------------------------|--------------------------------------------------------------------------------------------------------------------------------|
| <b>Data collection</b>                 |                                                                                                                       |                                                                                                                                |                                                                                                                                |
| Wavelength                             | 1.033 Å                                                                                                               | 1.720 Å                                                                                                                        | 1.860 Å                                                                                                                        |
| Space group                            | $P2_1$                                                                                                                | $P2_1$                                                                                                                         | $P2_1$                                                                                                                         |
| Cell dimensions                        |                                                                                                                       |                                                                                                                                |                                                                                                                                |
| <i>a</i> , <i>b</i> , <i>c</i> (Å)     | 75.060, 96.630, 99.341                                                                                                | 75.205, 96.752, 99.619                                                                                                         | 75.518, 96.987, 99.985                                                                                                         |
| $\beta$ (°)                            | 98.236                                                                                                                | 98.217                                                                                                                         | 98.571                                                                                                                         |
| Resolution (Å)                         | 50.00-2.24 (2.28-2.24)                                                                                                | 50.00-2.80 (2.85-2.80)                                                                                                         | 50.00-3.20 (3.26-3.20)                                                                                                         |
| $R_{\text{svm}}$ or $R_{\text{merge}}$ | 0.127 (0.690)                                                                                                         | 0.145 (0.735)                                                                                                                  | 0.162 (0.723)                                                                                                                  |
| $I / \sigma I$                         | 15.0 (2.2)                                                                                                            | 17.2 (2.0)                                                                                                                     | 14.9 (2.6)                                                                                                                     |
| Completeness (%)                       | 99.9 (97.7)                                                                                                           | 99.8 (96.6)                                                                                                                    | 100.0 (99.9)                                                                                                                   |
| Redundancy                             | 5.3 (3.5)                                                                                                             | 7.0 (4.3)                                                                                                                      | 7.2 (5.2)                                                                                                                      |

**Table S6.** Data collection statistics for  $\text{Mn}^{\text{IV}}/\text{Fe}^{\text{III}}\text{-}\beta_2$  (2 equiv  $\text{Mn}^{\text{II}}$  + 0.65 equiv  $\text{Fe}^{\text{II}}$  per  $\beta$  followed by exposure to excess  $\text{O}_2$ ).

|                                        | $\text{Mn}^{\text{IV}}/\text{Fe}^{\text{III}}\text{-}\beta_2$<br>(2:0.65 $\text{Mn}^{\text{II}}:\text{Fe}^{\text{II}}$ ) | $\text{Mn}^{\text{IV}}/\text{Fe}^{\text{III}}\text{-}\beta_2$<br>(2:0.65 $\text{Mn}^{\text{II}}:\text{Fe}^{\text{II}}$ ) [Fe ano] | $\text{Mn}^{\text{IV}}/\text{Fe}^{\text{III}}\text{-}\beta_2$<br>(2:0.65 $\text{Mn}^{\text{II}}:\text{Fe}^{\text{II}}$ ) [Mn ano] |
|----------------------------------------|--------------------------------------------------------------------------------------------------------------------------|-----------------------------------------------------------------------------------------------------------------------------------|-----------------------------------------------------------------------------------------------------------------------------------|
| <b>Data collection</b>                 |                                                                                                                          |                                                                                                                                   |                                                                                                                                   |
| Wavelength                             | 0.979 Å                                                                                                                  | 1.720 Å                                                                                                                           | 1.860 Å                                                                                                                           |
| Space group                            | $P2_1$                                                                                                                   | $P2_1$                                                                                                                            | $P2_1$                                                                                                                            |
| Cell dimensions                        |                                                                                                                          |                                                                                                                                   |                                                                                                                                   |
| <i>a</i> , <i>b</i> , <i>c</i> (Å)     | 75.277, 98.155, 100.707                                                                                                  | 75.277, 98.103, 100.637                                                                                                           | 75.219, 98.018, 100.624                                                                                                           |
| $\beta$ (°)                            | 97.675                                                                                                                   | 97.724                                                                                                                            | 97.672                                                                                                                            |
| Resolution (Å)                         | 30.00-1.90 (1.93-1.90)                                                                                                   | 50.00-2.11 (2.15-2.11)                                                                                                            | 50.00-2.15 (2.19-2.15)                                                                                                            |
| $R_{\text{svm}}$ or $R_{\text{merge}}$ | 0.060 (0.577)                                                                                                            | 0.111 (0.371)                                                                                                                     | 0.065 (0.449)                                                                                                                     |
| $I / \sigma I$                         | 18.9 (1.9)                                                                                                               | 21.3 (5.8)                                                                                                                        | 29.1 (4.0)                                                                                                                        |
| Completeness (%)                       | 99.3 (98.4)                                                                                                              | 100.0 (100.0)                                                                                                                     | 100.0 (99.9)                                                                                                                      |
| Redundancy                             | 3.2 (3.2)                                                                                                                | 7.3 (7.0)                                                                                                                         | 7.4 (7.0)                                                                                                                         |

**Table S7.** Data collection statistics for Mn<sup>II</sup>/Fe<sup>II</sup>-β<sub>2</sub> exposed to O<sub>2</sub> (ox. Mn<sup>II</sup>/Fe<sup>II</sup>-β<sub>2</sub>).<sup>a</sup>

| ox. Mn <sup>II</sup> /Fe <sup>II</sup> -β <sub>2</sub> |                         |
|--------------------------------------------------------|-------------------------|
| <b>Data collection</b>                                 |                         |
| Wavelength                                             | 0.979 Å                 |
| Space group                                            | <i>P</i> 2 <sub>1</sub> |
| Cell dimensions                                        |                         |
| <i>a, b, c</i> (Å)                                     | 75.130, 97.639, 100.039 |
| β (°)                                                  | 97.683                  |
| Resolution (Å)                                         | 50.00-1.68 (1.71-1.68)  |
| <i>R</i> <sub>sym</sub> or <i>R</i> <sub>merge</sub>   | 0.085 (0.596)           |
| <i>I</i> / σ <i>I</i>                                  | 19.6 (2.0)              |
| Completeness (%)                                       | 99.8 (99.0)             |
| Redundancy                                             | 5.6 (5.1)               |

<sup>a</sup>Crystallized by hanging drop vapor diffusion in an anaerobic chamber with 0.1 M HEPES, pH 7.0, 12% (w/v) PEG 3000, 0.2 M sodium acetate as the precipitant. The protein was adventitiously exposed to O<sub>2</sub> during crystallization or harvest. To prepare crystals for data collection, drops were overlaid with cryoprotectant solution (well solution supplemented with 40% (v/v) glycerol), and the resulting cryoprotectant-soaked crystals were mounted on rayon loops and frozen by immersion in liquid nitrogen.

**Table S8.** Data collection statistics for Fe<sub>2</sub><sup>II/III</sup>-β<sub>2</sub> exposed to O<sub>2</sub> (ox. Fe<sub>2</sub><sup>II/III</sup>-β<sub>2</sub>).<sup>a</sup>

| ox. Fe <sub>2</sub> <sup>II/III</sup> -β <sub>2</sub> |                         |
|-------------------------------------------------------|-------------------------|
| <b>Data collection</b>                                |                         |
| Wavelength                                            | 0.979 Å                 |
| Space group                                           | <i>P</i> 2 <sub>1</sub> |
| Cell dimensions                                       |                         |
| <i>a, b, c</i> (Å)                                    | 75.296, 98.040, 100.373 |
| β (°)                                                 | 97.695                  |
| Resolution (Å)                                        | 50.00-2.00 (2.03-2.00)  |
| <i>R</i> <sub>sym</sub> or <i>R</i> <sub>merge</sub>  | 0.084 (0.330)           |
| <i>I</i> / σ <i>I</i>                                 | 20.1 (4.7)              |
| Completeness (%)                                      | 95.7 (100.0)            |
| Redundancy                                            | 5.6 (5.7)               |

<sup>a</sup>Crystallized by hanging drop vapor diffusion in an anaerobic chamber with 0.1 M HEPES, pH 7.2, 10% (w/v) PEG 3000, 0.2 M sodium acetate as the precipitant. The protein was adventitiously exposed to O<sub>2</sub> during crystallization or harvest. To prepare crystals for data collection, drops were overlaid with cryoprotectant solution (well solution supplemented with 40% (v/v) glycerol), and the resulting cryoprotectant-soaked crystals were mounted on rayon loops and frozen by immersion in liquid nitrogen.

**Table S9.** Anomalous peak heights ( $\sigma$ ) at the Fe absorption edge for  $Ct \beta_2$  crystallographic datasets. Note that these values are generated by a subtraction procedure to eliminate the contribution from Mn. The procedure fails to account for the decrease in Mn absorption with decreasing wavelength away from the Mn  $K$ -edge and results in a slight underestimate of the amount of Fe present at each site.

| <b>Crystal</b>                                                               | <b>Chain</b> | <b>Site 1</b> | <b>Site 2</b> |
|------------------------------------------------------------------------------|--------------|---------------|---------------|
| <b>Mn<sup>II</sup>/Fe<sup>II</sup>-<math>\beta_2</math></b>                  | A            | 2.9           | 14.3          |
|                                                                              | B            | 3.8           | 14.9          |
|                                                                              | C            | 2.2           | 12.7          |
|                                                                              | D            | 3.4           | 15.5          |
| <b>Mn<sup>IV</sup>/Fe<sup>III</sup>-<math>\beta_2</math></b><br>procedure-3A | A            | 2.9           | 10.6          |
|                                                                              | B            | --            | 8.2           |
|                                                                              | C            | --            | 5.4           |
|                                                                              | D            | --            | 6.4           |
| <b>Mn<sup>IV</sup>/Fe<sup>III</sup>-<math>\beta_2</math></b><br>procedure-3B | A            | --            | 6.2           |
|                                                                              | B            | 2.9           | 8.7           |
|                                                                              | C            | --            | 6.0           |
|                                                                              | D            | --            | 4.0           |

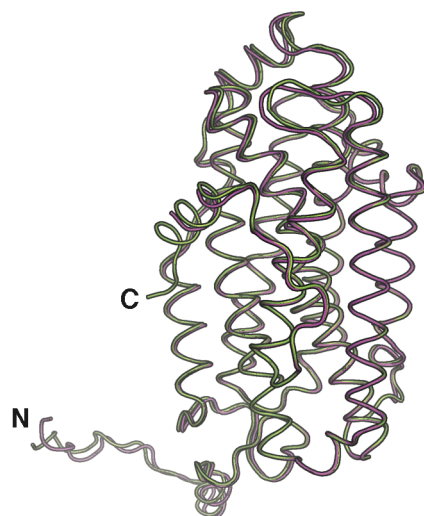

**Figure S1.** Secondary structure matching (SSM) superposition<sup>1</sup> for a representative  $\beta$  monomer from the apo *Ct*  $\beta_2$  (pink), *Ct*  $\text{Mn}^{\text{II}}/\text{Fe}^{\text{II}}\text{-}\beta_2$  (green) and *Ct*  $\text{Fe}_2^{\text{III/III}}\text{-}\beta_2$  (PDB accession code 1SYY, not shown) crystal structures indicates a virtually identical overall fold among all three structures (0.46 Å rmsd for 317  $\text{C}\alpha$  atoms).

**A**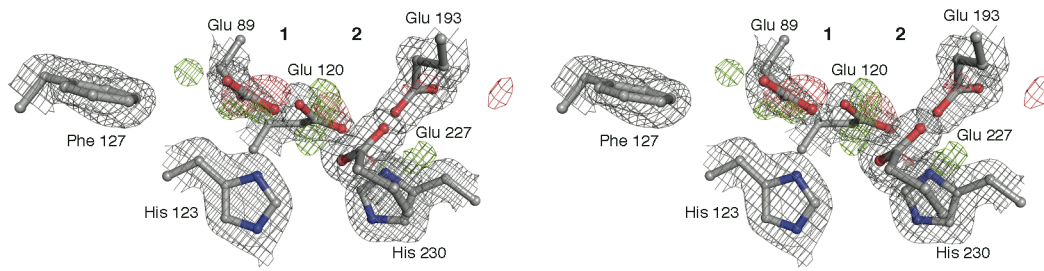**B**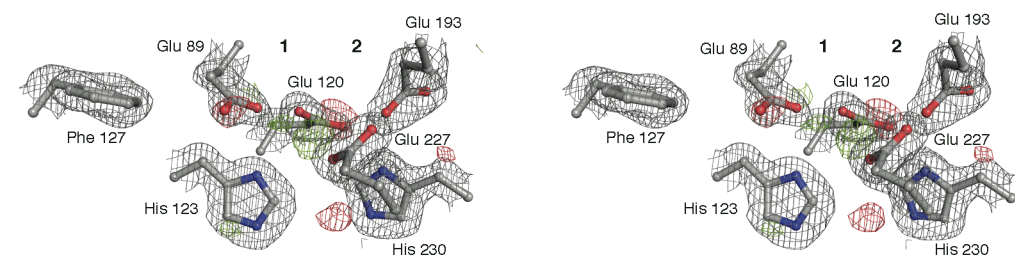**C**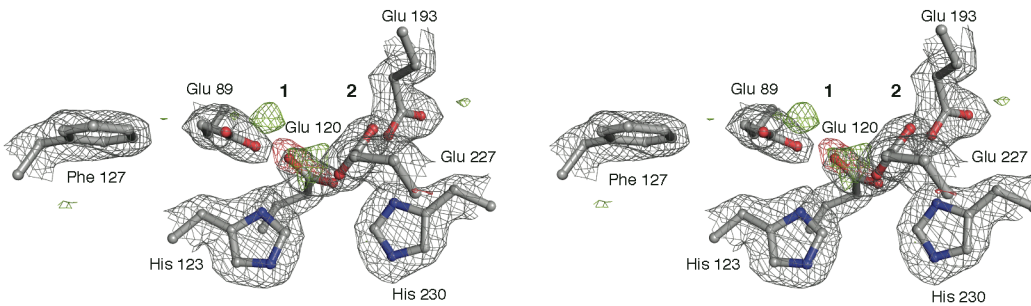**D**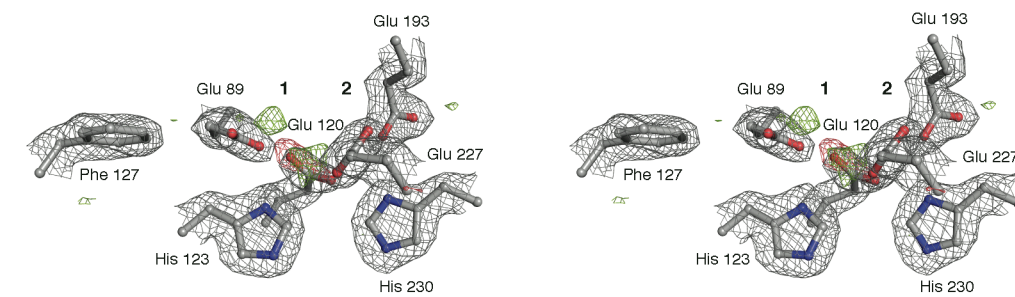



**Figure S2.** Stereo-views of the electron density map for the *Ct* apo  $\beta_2$  metal binding site in each of the four  $\beta$  monomers in the ASU, designated chains A (**A**), B (**B**), C (**C**), and D (**D**). Selected protein side chains are shown in stick format. A  $2F_o-F_c$  map is shown in gray mesh (contoured at  $1.2\sigma$ ) and an  $F_o-F_c$  difference map is shown in red and green mesh (contoured at  $3.0\sigma$ ). Note minor amounts of difference density associated with Glu 89 and Glu 120, which may indicate partial disorder in the position of the side chains or the presence of disordered solvent nearby. Ordered waters were not modeled in the metal binding site due to the absence of  $2F_o-F_c$  density at a sufficient level in the initial electron density maps. Anomalous difference maps (data not shown) were also calculated from data collected at the Mn and Fe X-ray absorption edges (**Table S1**), and these are consistent with the absence of metal ions in the crystals, indicating that adventitious Mn or Fe does not account for any of this difference density.

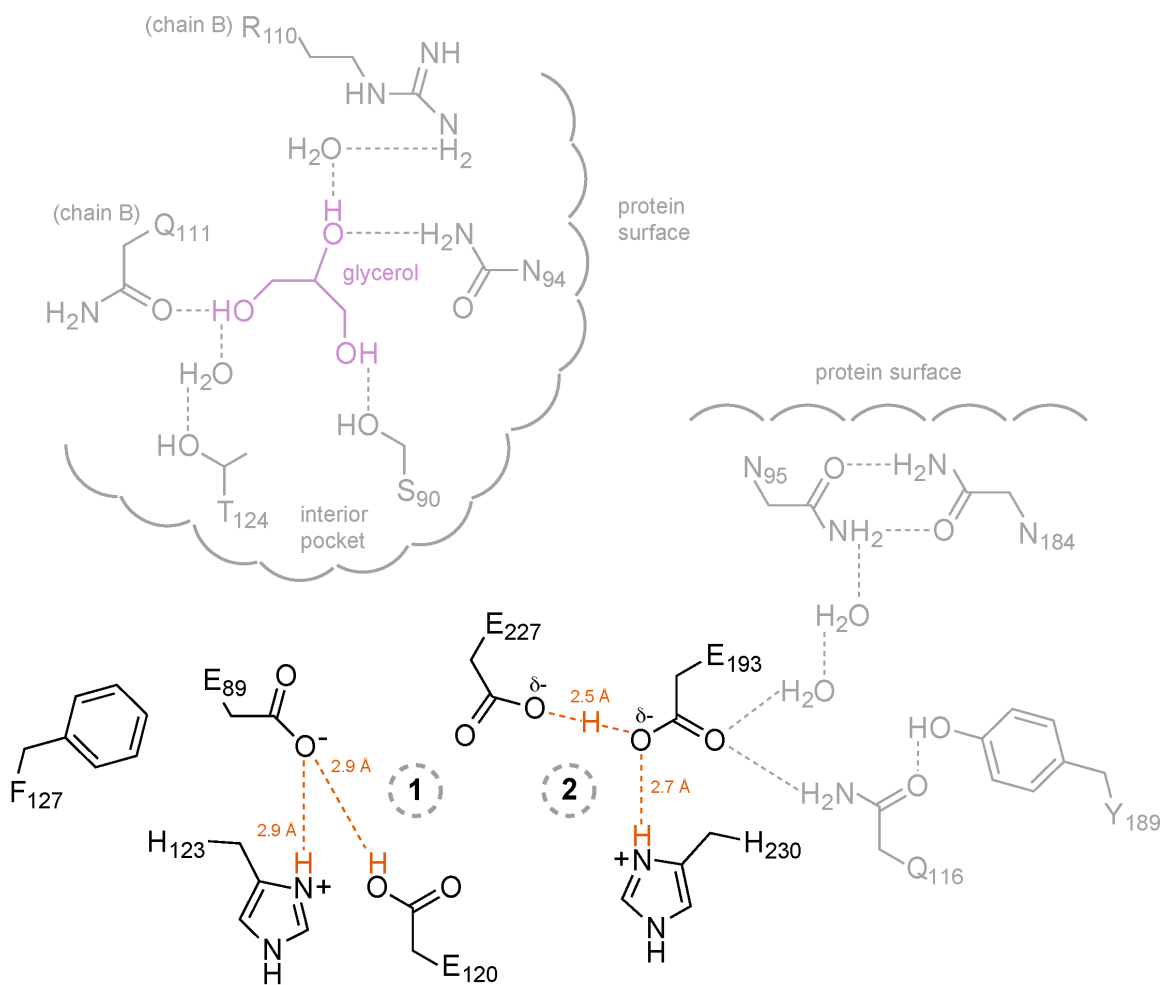

**Figure S3.** Schematic depiction of the cofactor site in apo  $\beta_2$  and the surrounding residues which constitute two potential routes for proton efflux, metal influx, or both. Ligands and other selected residues are shown in black. Potential metal influx pathway residues are shaded in gray. Proposed protonation sites and potential hydrogen bonds among coordinating side chains are highlighted in red. A glycerol molecule observed in some crystallographic datasets (**Figure S9**) is shown in purple.

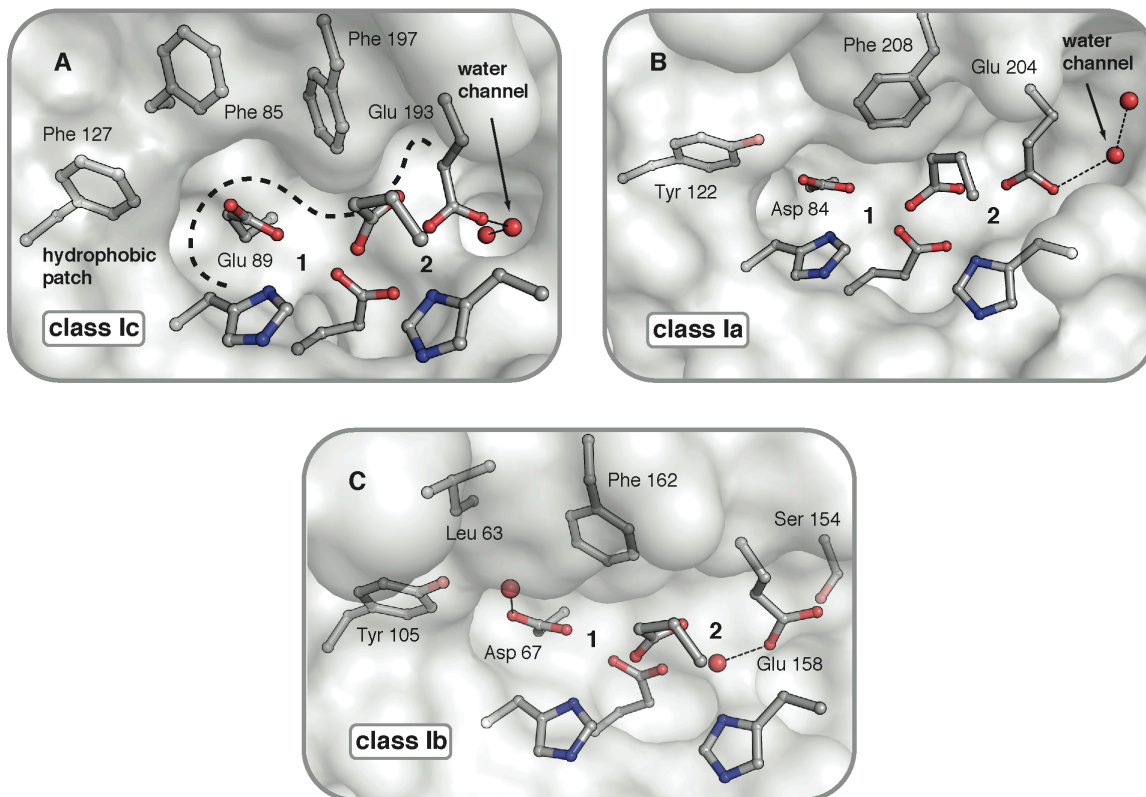

**Figure S4.** Second-sphere interactions of metal-binding ligands in class Ic apo  $\beta_2$  (A) compared with apo class Ia (B)<sup>2</sup> and class Ib (PDB accession code 4M1F) (C)  $\beta_2$  structures. Ligand residues are shown as sticks, and selected residues and water molecules outside the metal-binding site are shown in stick or sphere format, respectively. A cutaway view of the surrounding protein environment is shown as a transparent surface. This analysis reveals close steric packing around the ligands in class Ic  $\beta_2$ , defined primarily by a hydrophobic patch that surrounds site 1 and a short water channel that interacts with site 2, which brings the ligand residues closer together than in class Ia and Ib apo  $\beta_2$  proteins. This feature of the surrounding protein environment may contribute to the absence of major conformational changes upon metal binding.

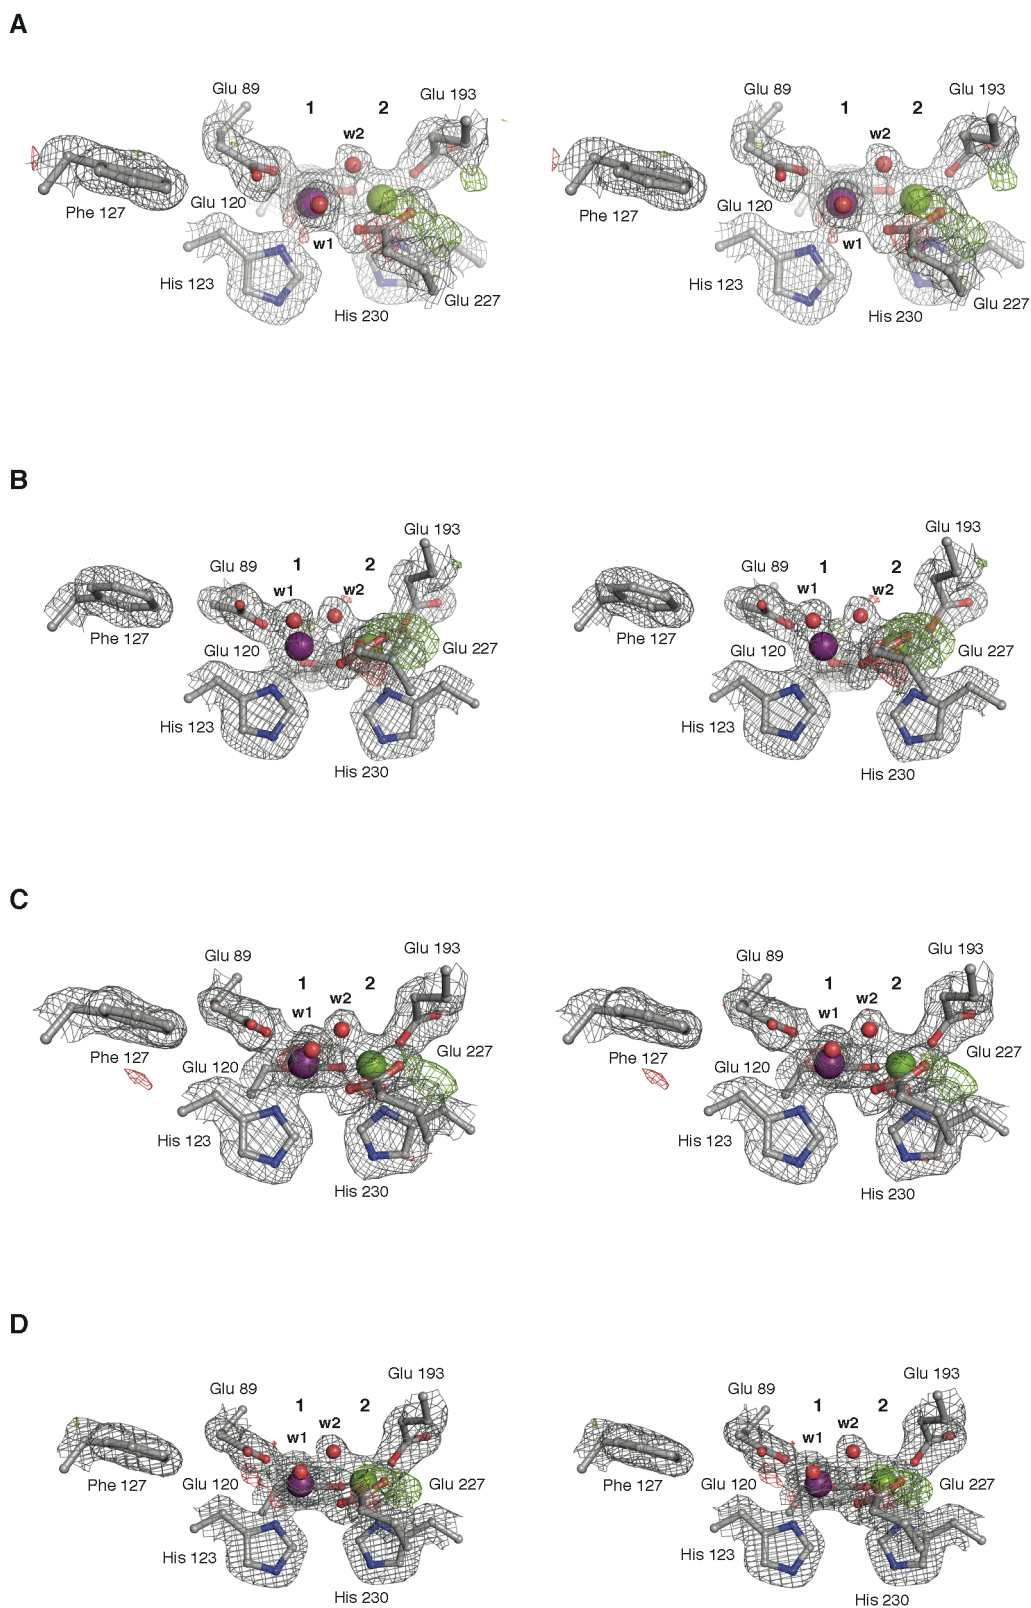

**Figure S5.** Stereoviews of the electron density map for the Mn<sup>II</sup>/Fe<sup>II</sup>- $\beta_2$  metal-binding site in each of the four  $\beta$  monomers in the ASU designated chains A (**A**), B (**B**), C (**C**),

and D (**D**).  $\text{Mn}^{\text{II}}$  and  $\text{Fe}^{\text{II}}$  ions are shown as purple and green spheres. Coordinated water molecules are shown as red spheres and labeled w1 and w2 in each view. Selected protein residues are shown in stick format. A  $2F_o-F_c$  map is shown in gray mesh (contoured at  $1.2\sigma$ ), and an  $F_o-F_c$  difference map is shown in red and green mesh (contoured at  $3.0\sigma$ ).

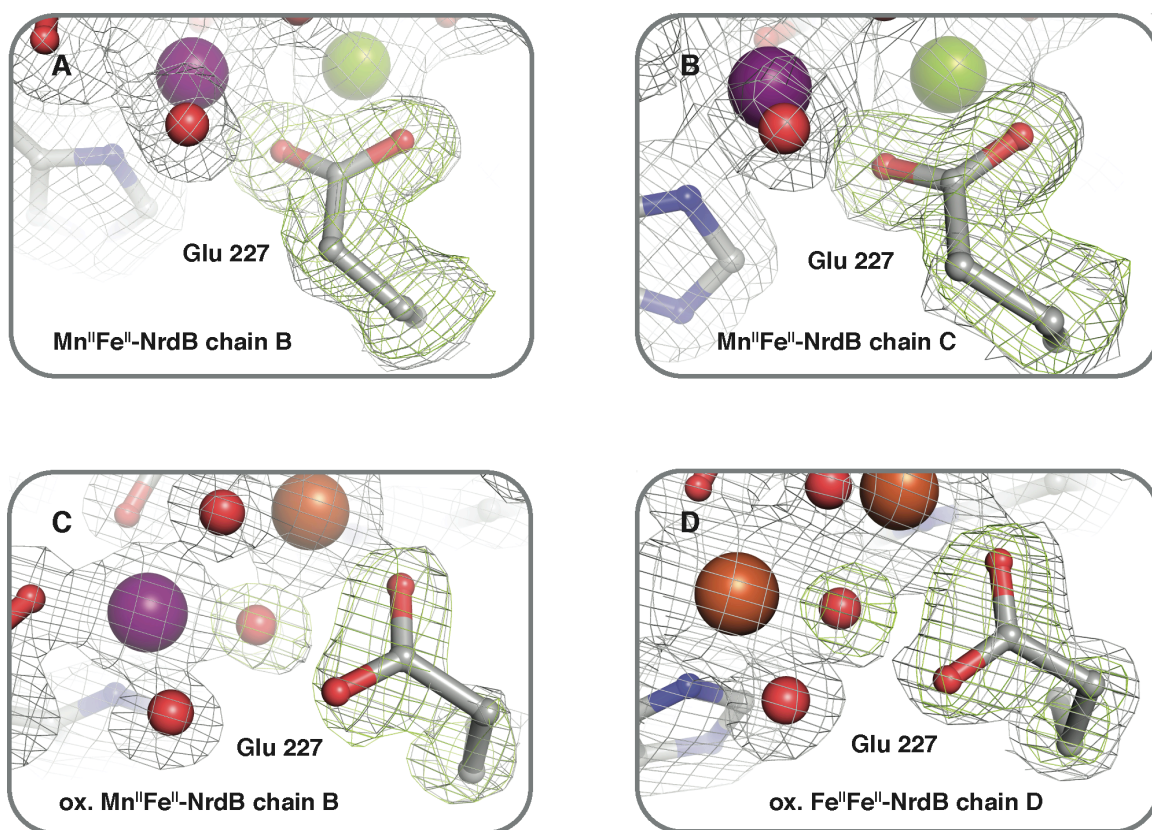

**Figure S6.** Zoomed-in views of the electron density map associated with bridging ligand Glu 227 in *Ct* Mn<sup>II</sup>/Fe<sup>II</sup>- $\beta_2$  (NrdB) and its oxidized form. To determine whether the difference density associated with Glu 227 in the Mn<sup>II</sup>Fe<sup>II</sup>- $\beta_2$  (NrdB) structure (**Figure S5**) might warrant modeling the residue in an alternate conformation, omit maps were generated for the side chain, as shown in **(A)** and **(B)** (green mesh, contoured at  $5.5\sigma$ ). These maps are consistent with the current model showing the residue coordinating both metal sites in a  $\mu$ - $\eta^1, \eta^2$  interaction. To facilitate comparison, parts **(C)** and **(D)** show a similar omit map (green mesh,  $4\sigma$  for **(C)** and  $6.6\sigma$  for **(D)**) for the residue in datasets from oxidized protein samples (**Tables S7** and **S8**), in which the side chain binds the site 2 metal in monodentate fashion.



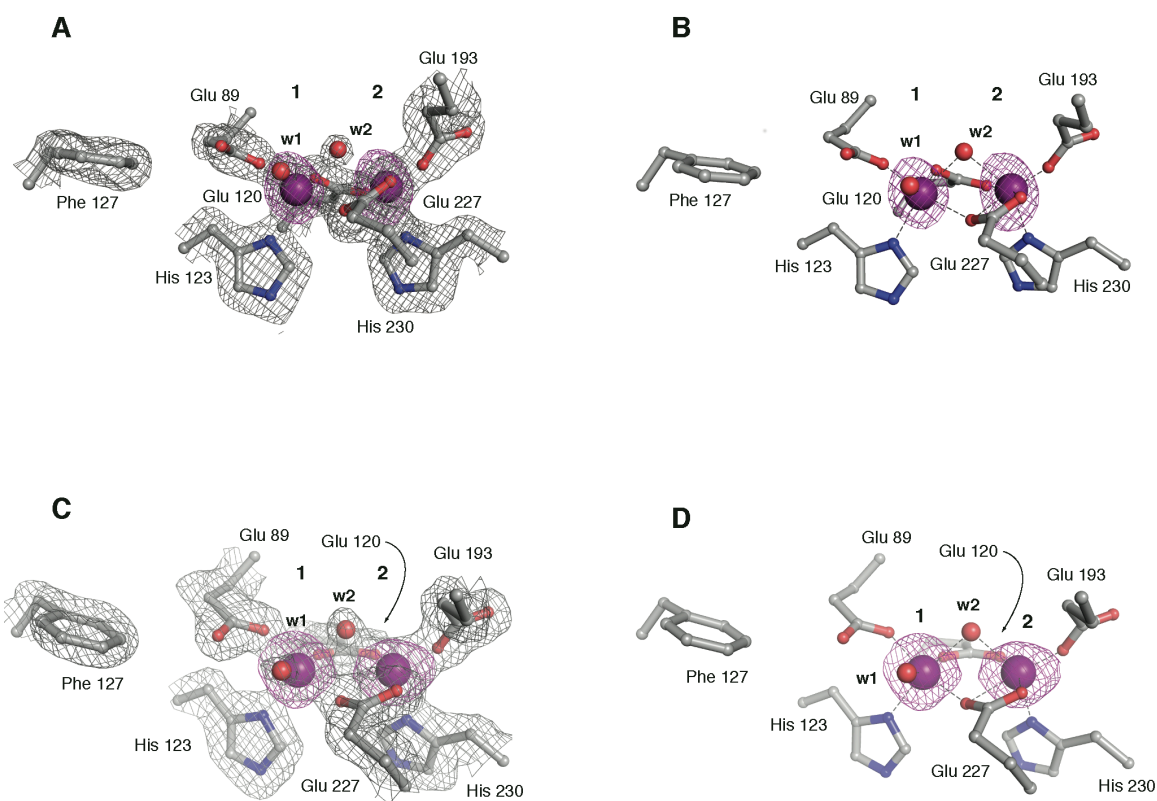

**Figure S7.** Electron density maps for a representative metal binding site of *Ct*  $\beta_2$  crystallized with  $\text{Mn}^{\text{II}}$  alone at 1 equiv per  $\beta$  monomer (**Table S3**) in (**A**) and (**B**) and at 2 equiv per  $\beta$  monomer with an additional soak in 10 mM  $\text{MnCl}_2$  after crystallization (**Table S4**) in (**C**) and (**D**). A  $2F_o - F_c$  map (contoured at  $1.2\sigma$ ) is shown in gray mesh and an Mn anomalous difference map (contoured at  $4\sigma$ ) is shown in purple mesh. Metal ion occupancies range from 40-70% in the 1 equiv  $\text{Mn}^{\text{II}}$  structure (**A**, **B**) and 70-90% in the structure with excess  $\text{Mn}^{\text{II}}$  (**C**, **D**).

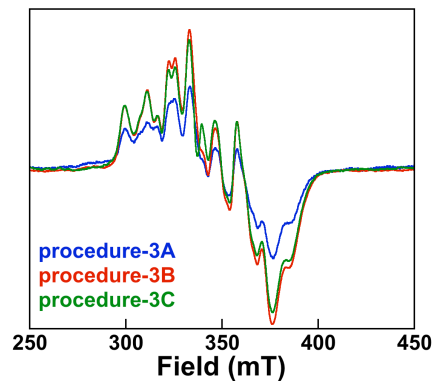

**Figure S8.** X-band EPR spectra of the dithionite-reduced, Mn<sup>III</sup>/Fe<sup>III</sup> forms of the protein used for the oxidized structure reported in **Figure 3B** of the main manuscript. A description of the sample preparation is provided in **Experimental Procedures**. The quantities of metals retained in each sample and the demonstrated activities are reported in **Table 2**. Spectrometer conditions were: 9.48 GHz microwave frequency, 100 KHz modulation frequency, 20 mW microwave power, 0.1 mT modulation amplitude,  $14 \pm 0.2$  K temperature, 0.163 time constant, 167 s scan time.



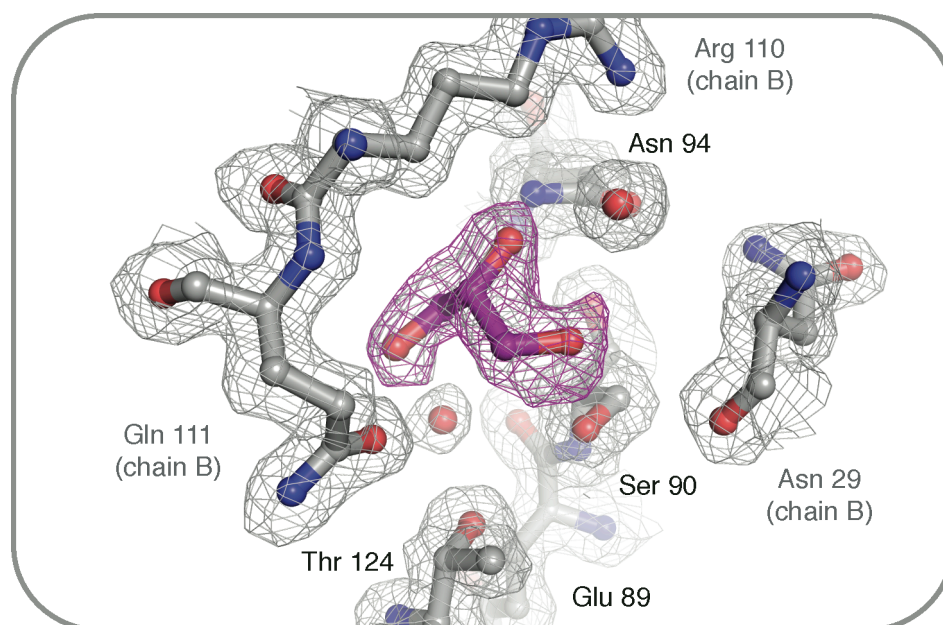

**Figure S9.** Electron density for a glycerol molecule bound in an interior pocket near the active site described in **Figure S4**. A  $2F_o - F_c$  map (contoured at  $1.2\sigma$ ) is shown in gray mesh, and an omit map (contoured at  $4.6\sigma$ ) is shown in purple mesh, both calculated from the dataset described in **Table S7**. This pocket is lined by hydrophilic side chains (Thr 124 and Ser 90) adjacent in the sequence to protein ligands to site 1 (Glu 89, His 123). Additionally, the glycerol molecule interacts with an Asn pair (Asn 94, Asn 29 from chain B) and other polar residues contributed by the adjacent chain. The glycerol molecule is derived from the protein storage buffer or cryoprotectant solution, but its binding site may be important as a metal ion or proton influx/efflux route.

## SUPPORTING REFERENCES

1. Krissinel, E., and Henrick, K. (2004) Secondary-structure matching (SSM), a new tool for fast protein structure alignment in three dimensions. *Acta Crystallogr. D60*, 2256-2268.
2. Åberg, A., Nordlund, P., and Eklund, H. (1993) Unusual clustering of carboxyl side chains in the core of iron-free ribonucleotide reductase. *Nature 361*, 276-278.
